# Supplementary material for: Emergence and propagation of epistasis in metabolic networks
Source: eLife journal article supplement (doi:10.7554/elife.60200), 2021-02-02
Supplement: supp [file elife-60200-supp-v1.zip]

## Definitions:

$\$Assumptions = w_{12} \geq 0 \ \&\& \ w_{13} \geq 0 \ \&\& \ w_{16} \geq 0 \ \&\& \ w_{24} \geq 0 \ \&\& \ w_{25} \geq 0 \ \&\&$   
 $w_{36} \geq 0 \ \&\& \ w_{45} \geq 0 \ \&\& \ u > 0 \ \&\& \ v > 0 \ \&\& \ w_{21} \geq 0 \ \&\& \ w_{31} \geq 0 \ \&\& \ w_{61} \geq 0 \ \&\&$   
 $w_{42} \geq 0 \ \&\& \ w_{52} \geq 0 \ \&\& \ w_{63} \geq 0 \ \&\& \ w_{54} \geq 0 \ \&\& \ K_{34} > 0 \ \&\& \ K_{56} > 0 \ \&\& \ K_{31} > 0 \ \&\& \ K_{51} > 0$   
 $w = \{\{0, w_{12}, w_{13}, 0, 0, w_{16}\}, \{w_{21}, 0, 0, w_{24}, w_{25}, 0\}, \{w_{31}, 0, 0, u, 0, w_{36}\},$   
 $\{0, w_{42}, u / K_{34}, 0, w_{45}, 0\}, \{0, w_{52}, 0, w_{54}, 0, v\}, \{w_{61}, 0, w_{63}, 0, v / K_{56}, 0\}\}$

$w_{12} \geq 0 \ \&\& \ w_{13} \geq 0 \ \&\& \ w_{16} \geq 0 \ \&\& \ w_{24} \geq 0 \ \&\& \ w_{25} \geq 0 \ \&\& \ w_{36} \geq 0 \ \&\&$   
 $w_{45} \geq 0 \ \&\& \ u > 0 \ \&\& \ v > 0 \ \&\& \ w_{21} \geq 0 \ \&\& \ w_{31} \geq 0 \ \&\& \ w_{61} \geq 0 \ \&\& \ w_{42} \geq 0 \ \&\&$   
 $w_{52} \geq 0 \ \&\& \ w_{63} \geq 0 \ \&\& \ w_{54} \geq 0 \ \&\& \ K_{34} > 0 \ \&\& \ K_{56} > 0 \ \&\& \ K_{31} > 0 \ \&\& \ K_{51} > 0$

$\{\{0, w_{12}, w_{13}, 0, 0, w_{16}\}, \{w_{21}, 0, 0, w_{24}, w_{25}, 0\}, \{w_{31}, 0, 0, u, 0, w_{36}\},$   
 $\{0, w_{42}, \frac{u}{K_{34}}, 0, w_{45}, 0\}, \{0, w_{52}, 0, w_{54}, 0, v\}, \{w_{61}, 0, w_{63}, 0, \frac{v}{K_{56}}, 0\}\}$

## MatrixForm[w]

ixForm=

$$\begin{pmatrix} 0 & w_{12} & w_{13} & 0 & 0 & w_{16} \\ w_{21} & 0 & 0 & w_{24} & w_{25} & 0 \\ w_{31} & 0 & 0 & u & 0 & w_{36} \\ 0 & w_{42} & \frac{u}{K_{34}} & 0 & w_{45} & 0 \\ 0 & w_{52} & 0 & w_{54} & 0 & v \\ w_{61} & 0 & w_{63} & 0 & \frac{v}{K_{56}} & 0 \end{pmatrix}$$

## Sum of rows

$d = \text{Table}[\text{Total}[w[[i, \text{All}]]], \{i, 6\}]$

$d_{34} = \text{Collect}[\text{Expand}[d[[3]] * d[[4]] - w[[3, 4]] * w[[4, 3]]], u]$

$d_{56} = \text{Collect}[\text{Expand}[d[[5]] * d[[6]] - w[[5, 6]] * w[[6, 5]]], v]$

$$\left\{w_{12} + w_{13} + w_{16}, w_{21} + w_{24} + w_{25}, u + w_{31} + w_{36}, \frac{u}{K_{34}} + w_{42} + w_{45}, v + w_{52} + w_{54}, \frac{v}{K_{56}} + w_{61} + w_{63}\right\}$$

$$w_{31} w_{42} + w_{36} w_{42} + w_{31} w_{45} + w_{36} w_{45} + u \left( \frac{w_{31}}{K_{34}} + \frac{w_{36}}{K_{34}} + w_{42} + w_{45} \right)$$

$$w_{52} w_{61} + w_{54} w_{61} + w_{52} w_{63} + w_{54} w_{63} + v \left( \frac{w_{52}}{K_{56}} + \frac{w_{54}}{K_{56}} + w_{61} + w_{63} \right)$$

Effective reaction rates after elimination of metabolites 5 and 6 (useful for easy differentiation w.r.to u), and the final effective reaction rate  $y$  of module  $\mu$

```

W = Table[w[[i, j]] +
  1
  d56 (d[[5]] * w[[i, 6]] * w[[6, j]] + d[[6]] * w[[i, 5]] * w[[5, j]] + w[[i, 5]] *
    w[[5, 6]] * w[[6, j]] + w[[i, 6]] * w[[6, 5]] * w[[5, j]]), {i, 4}, {j, 4}];
W = UpperTriangularize[W, 1] + LowerTriangularize[W, -1];
ynum56 =
  W[[1, 3]] * W[[3, 2]] * Total[W[[4, All]]] + W[[1, 4]] * W[[4, 2]] * Total[W[[3, All]]] +
  W[[1, 3]] * W[[3, 4]] * W[[4, 2]] + W[[1, 4]] * W[[4, 3]] * W[[3, 2]];
ydenom56 = Total[W[[3, All]]] * Total[W[[4, All]]] - W[[3, 4]] * W[[4, 3]];
y = W[[1, 2]] + ynum56 / ydenom56;

```

Effective reaction rates after elimination of metabolites 3 and 4 (useful for easy differentiation w.r.to v)

```

V = Table[w[[i, j]] +
  1
  d34 (d[[3]] * w[[i, 4]] * w[[4, j]] + d[[4]] * w[[i, 3]] * w[[3, j]] + w[[i, 3]] *
    w[[3, 4]] * w[[4, j]] + w[[i, 4]] * w[[4, 3]] * w[[3, j]]), {i, 6}, {j, 6}];
V = UpperTriangularize[V, 1] + LowerTriangularize[V, -1];
V[[All, 3]] = 0;
V[[3, All]] = 0;
V[[All, 4]] = 0;
V[[4, All]] = 0;

```

Sanity check that the denominator obtained after elimination of 5,6 first and 3,4 second is the same as the one obtained after elimination of 3,4 first and 5,6 second are the same (multiplied by d34 and d56, respectively, which makes them polynomial).

```

dyduDenom = Total[W[[3, All]]] * Total[W[[4, All]]] - W[[3, 4]] * W[[4, 3]];
dydvDenom = Total[V[[5, All]]] * Total[V[[6, All]]] - V[[5, 6]] * V[[6, 5]];
Simplify[dydvDenom * d34] == Simplify[dyduDenom * d56]
True

```

Defining numerators and denominators for the derivatives w.r.t to u and v

```

dyduNum = W[[3, 1]] * W[[4, 2]] - W[[3, 2]] * W[[4, 1]];
dydvNum = V[[5, 2]] * V[[6, 1]] - V[[5, 1]] * V[[6, 2]];

```

Derivatives of y w.r.to u and v

$$dydu = \frac{1}{K31} * \left( \frac{dyduNum}{dyduDenom} \right)^2;$$

$$dydv = \frac{1}{K51} * \left( \frac{dydvNum}{dydvDenom} \right)^2;$$

Collecting coefficients in the numerators and denominators of the dydu derivative:

```

dyduNumCoefList = Map[Simplify, CoefficientList[dyduNum * d56, v]]
dyduDenomCoefList = Map[Simplify, CoefficientList[dyduDenom * d56, v]]
ψ = w42 * w52 + w54 * w42 + w45 * w52;
φ = w31 * w61 + w63 * w31 + w36 * w61;
au = ψ * w31 / K56 + w42 * φ;
bu = ψ * φ;
eu = u * ((w31 * w52 + w31 * w54 + w36 * w52) / K34 / K56 + (w42 * w61 + w42 * w63 + w45 * w61)) +
      d[[4]] * φ + d[[3]] * ψ / K56;
fu = u * ((w52 + w54) / K34 * φ + (w61 + w63) * ψ) + φ * ψ
Expand[dyduNumCoefList[[1]]] == Expand[bu]
Expand[dyduNumCoefList[[2]]] == Expand[au]
Expand[dyduDenomCoefList[[1]]] == Expand[ fu]
Expand[dyduDenomCoefList[[2]]] == Expand[ eu]

```

$$\left\{ (w45 w52 + w42 (w52 + w54)) (w36 w61 + w31 (w61 + w63)), \frac{1}{K56} \right. \\ \left. (w31 w45 w52 + K56 w36 w42 w61 + w31 w42 (w52 + w54 + K56 (w61 + w63))) \right\}$$

$$\left\{ (w45 w52 + w42 (w52 + w54)) (w36 w61 + w31 (w61 + w63)) + \right. \\ \frac{1}{K34} u (w36 (w52 + w54) w61 + w31 (w52 + w54) (w61 + w63) + \\ K34 (w45 w52 + w42 (w52 + w54)) (w61 + w63)), \frac{1}{K34 K56} \\ \left. (u (w36 (w52 + K56 w61) + K34 w45 (w52 + K56 w61) + w31 (w52 + w54 + K56 (w61 + w63)) + \right. \\ K34 w42 (w52 + w54 + K56 (w61 + w63))) + \\ K34 (w36 w45 (w52 + K56 w61) + w36 w42 (w52 + w54 + K56 w61) + \\ \left. w31 w45 (w52 + K56 (w61 + w63)) + w31 w42 (w52 + w54 + K56 (w61 + w63))) \right\}$$

$$(w42 w52 + w45 w52 + w42 w54) (w31 w61 + w36 w61 + w31 w63) + \\ u \left( (w42 w52 + w45 w52 + w42 w54) (w61 + w63) + \frac{(w52 + w54) (w31 w61 + w36 w61 + w31 w63)}{K34} \right)$$

True

True

True

True

Collecting coefficients in the numerators and denominators of the dydv derivative:

```

dydvNumCoefList = Map[Simplify, CoefficientList[dydvNum * d34, u]]
dydvDenomCoefList = Map[Simplify, CoefficientList[dydvDenom * d34, u]]
av =  $\psi * w61 + \phi * w52 / K34$ ;
bv =  $\psi * \phi$ ;
ev =  $v * ((w31 * w52 + w31 * w54 + w36 * w52) / K34 / K56 + (w42 * w61 + w42 * w63 + w45 * w61)) +$ 
 $d[[5]] / K34 * \phi + d[[6]] * \psi$ ;
fv =  $v * ((w42 + w45) * \phi + (w31 + w36) / K56 * \psi) + \phi * \psi$ 
Expand[dydvNumCoefList[[1]]] == Expand[bv]
Expand[dydvNumCoefList[[2]]] == Expand[av]
Expand[dydvDenomCoefList[[1]]] == Expand[ fv]
Expand[dydvDenomCoefList[[2]]] == Expand[ ev]

```

$$\left\{ \frac{(w45 w52 + w42 (w52 + w54)) (w36 w61 + w31 (w61 + w63)) + w36 w52 w61 + K34 (w45 w52 + w42 (w52 + w54)) w61 + w31 w52 (w61 + w63)}{K34} \right\}$$

$$\left\{ \frac{v (w31 + w36) (w45 w52 + w42 (w52 + w54))}{K56} + \frac{(v (w42 + w45) + w45 w52 + w42 (w52 + w54)) (w36 w61 + w31 (w61 + w63))}{K34 K56} + \frac{1}{K34 K56} (K56 (w36 (w52 + w54) w61 + w31 (w52 + w54) (w61 + w63)) + K34 (w45 w52 + w42 (w52 + w54)) (w61 + w63)) + v (w36 (w52 + K56 w61) + K34 w45 (w52 + K56 w61) + w31 (w52 + w54 + K56 (w61 + w63)) + K34 w42 (w52 + w54 + K56 (w61 + w63))) \right\}$$

$$(w42 w52 + w45 w52 + w42 w54) (w31 w61 + w36 w61 + w31 w63) + v \left( \frac{(w31 + w36) (w42 w52 + w45 w52 + w42 w54)}{K56} + (w42 + w45) (w31 w61 + w36 w61 + w31 w63) \right)$$

```

True
True
True
True

```

### Obtaining the pre-factor $\beta$ in the second derivative $d^2ydu dv$

```

d2ydu dvNum1 = Simplify[dyduNumCoefList[[2]] * dyduDenomCoefList[[1]] -
dyduNumCoefList[[1]] * dyduDenomCoefList[[2]]];
 $\beta = -w36 * \psi / K56 - w45 * \phi$ ;
Simplify[d2ydu dvNum1 / (dydvNum * d34)] == Simplify[ $\beta$ ]
True

```

### Another way of obtaining $\beta$

```
Simplify[(D[dyduNum, v] * dyduDenom - dyduNum * D[dyduDenom, v]) *
d56^2 / dydvNum / d34] == Simplify[β]
```

True

Verifying that  $\beta$  in the second derivative  $d2ydvdu$  is the same as above

```
d2ydvduNum1 = Simplify[dydvNumCoefList[[2]] * dydvDenomCoefList[[1]] -
dydvNumCoefList[[1]] * dydvDenomCoefList[[2]]];
```

```
Simplify[d2ydvduNum1 / (dyduNum * d56)]
```

$$\frac{w36 w54 w61 + K34 (w45 w52 + w42 (w52 + w54)) w63 + w31 w54 (w61 + w63)}{K34}$$
