# Supplementary figures and images for: Emergence and propagation of epistasis in metabolic networks
Source: eLife journal article supplement (doi:10.7554/elife.60200), 2021-02-02

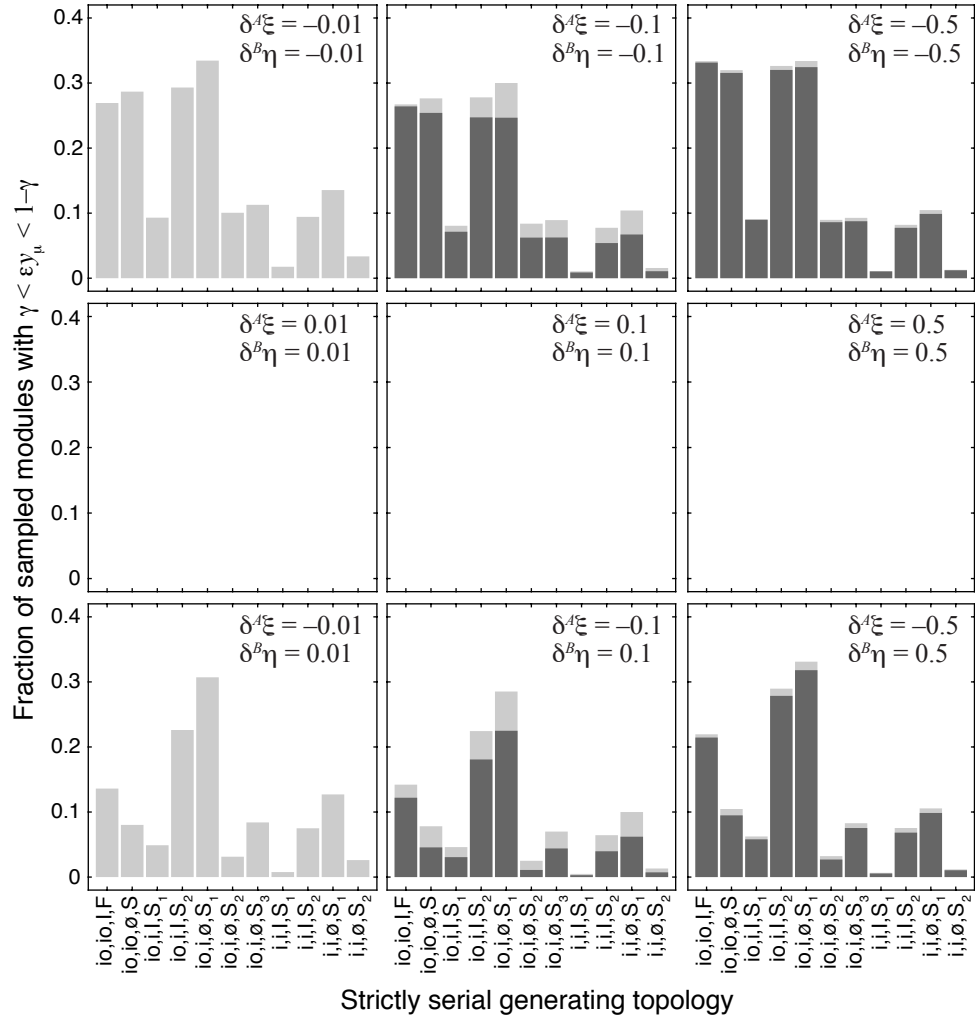

Supplement: supp [file elife-60200-supp-v1.zip]

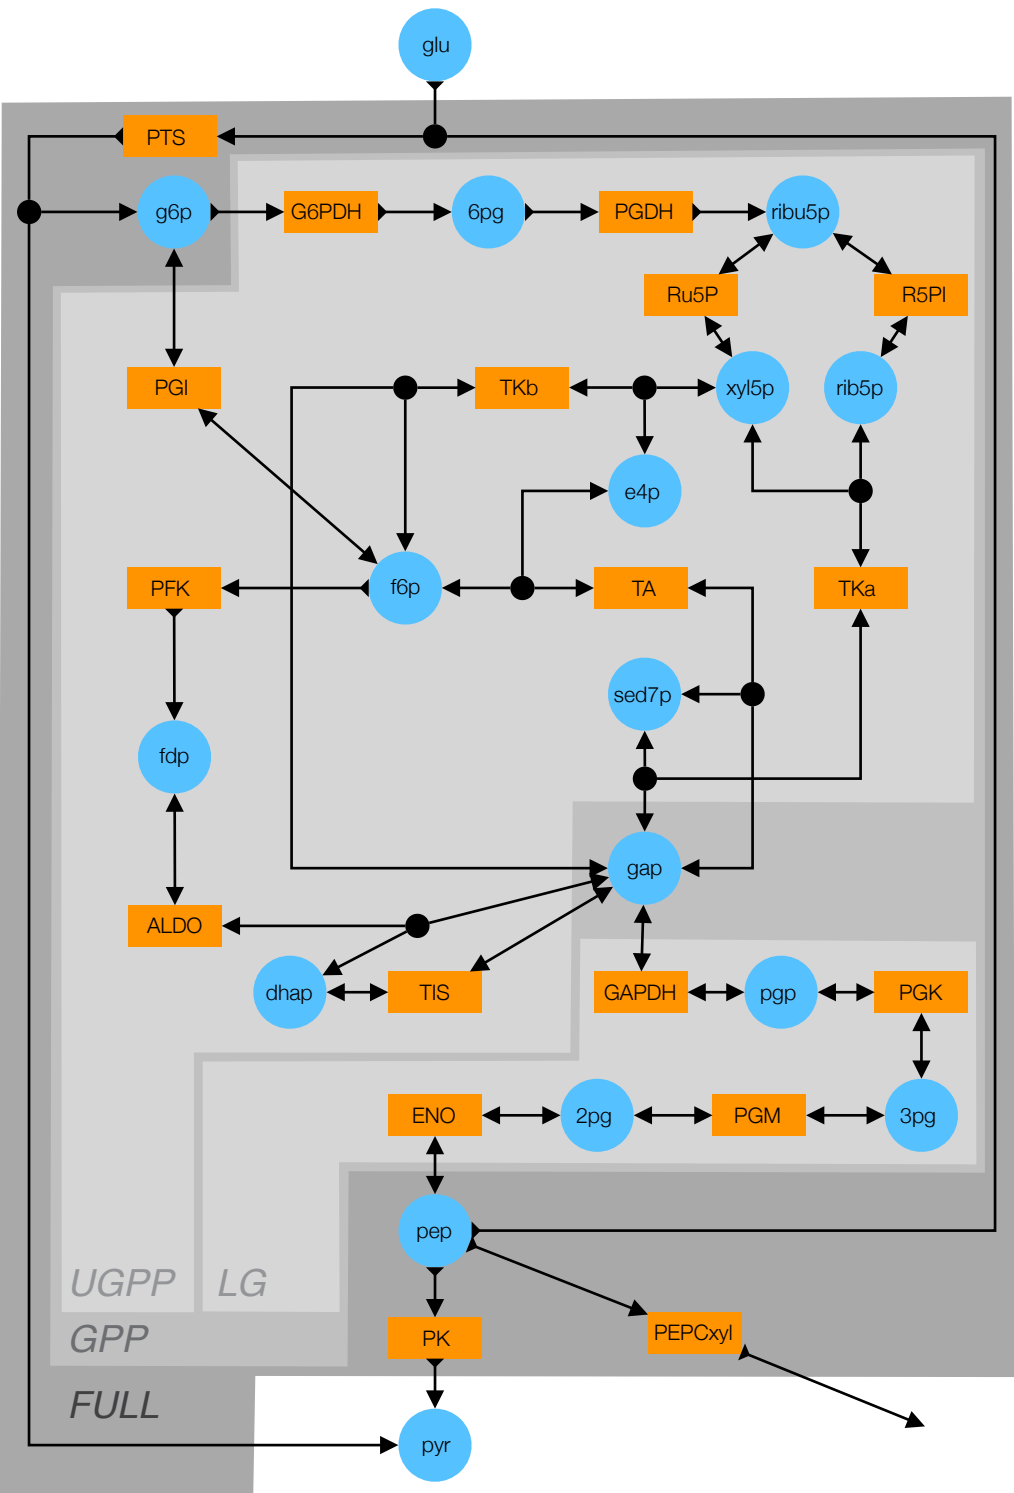

Supplement: supp [file elife-60200-supp-v1.zip]

Fraction of sampled modules

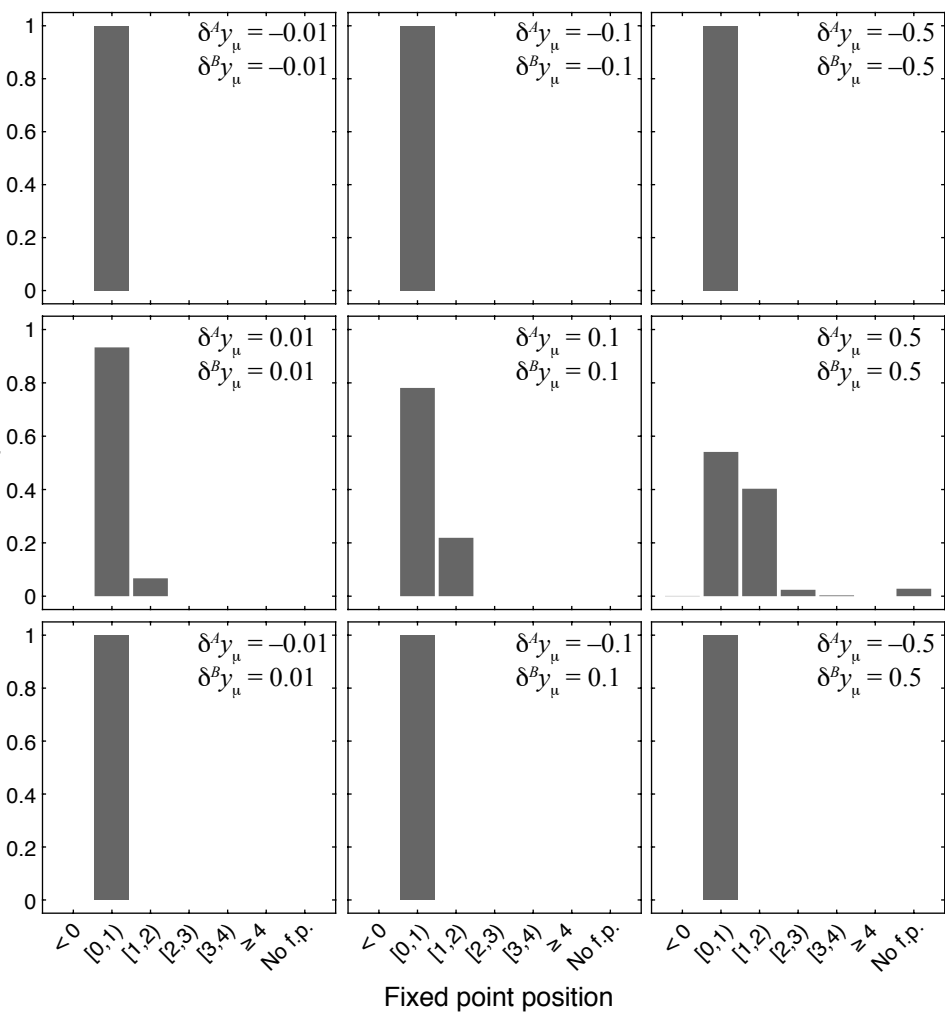

Supplement: supp [file elife-60200-supp-v1.zip]

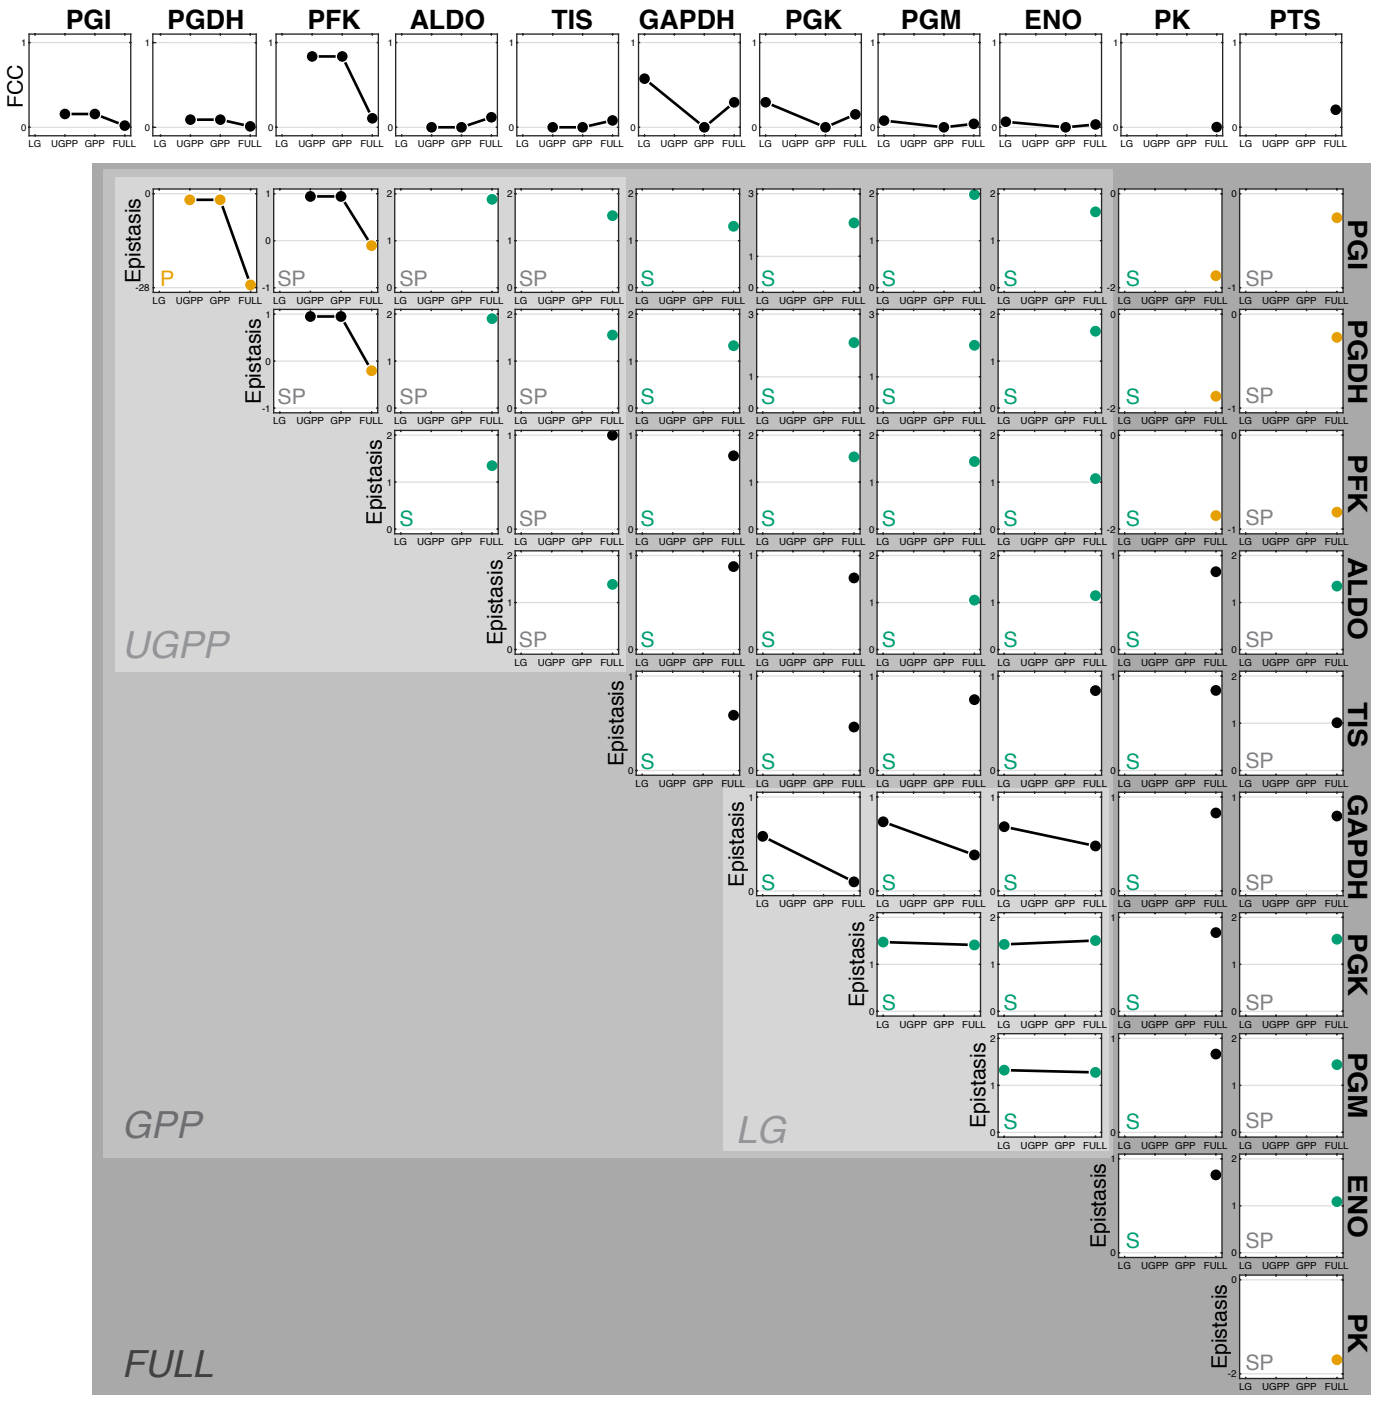

Supplement: supp [file elife-60200-supp-v1.zip]

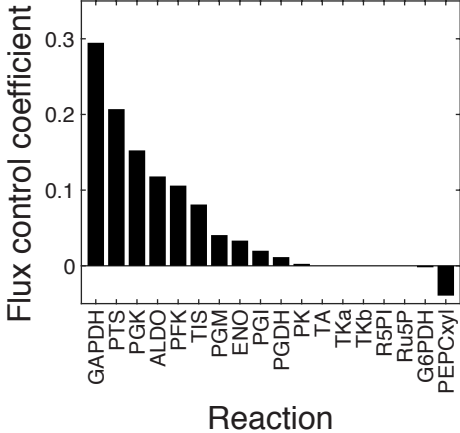

Supplement: supp [file elife-60200-supp-v1.zip]
